# Supplementary material
Source: MDPI journal article supplement (https://www.mdpi.com/2076-3417/11/10/4711)
Supplement: s1 [file s1]

**Table S1.** The effects of 100 kinds of extracts delivered from KRIPP on LPS-induced nitrite in RAW264.7 cells.

| No<br>. | Lot<br>Number. | Scientific name                                        | solvent  | nitrite<br>(% of LPS-<br>group) |
|---------|----------------|--------------------------------------------------------|----------|---------------------------------|
| 1       | FBM-098-001    | Knema polianei W.J.J.O.deWilde                         | Methanol | 87.54 ± 3.21                    |
| 2       | FBM-098-003    | Decaspermum parviflorum (Lam.) A.J. Scott              | Methanol | 95.54 ± 0.22                    |
| 3       | FBM-098-005    | Phyllagathis megalocentra C.Hansen                     | Methanol | 121.32 ± 6.91                   |
| 4       | FBM-098-007    | Hedyotis capitellata Wall. Ex G. Don                   | Methanol | 87.14 ± 0.84                    |
| 5       | FBM-098-008    | Campylotropis splendens Schindl.                       | Methanol | 88.93 ± 3.75                    |
| 6       | FBM-098-009    | Tarenna thorelii Pit.                                  | Methanol | 79.12 ± 3.10                    |
| 7       | FBM-098-010    | Pycnarrhena poilanei (Gagnep.) Forman                  | Methanol | 98.81 ± 4.77                    |
| 8       | FBM-098-011    | Rhaphiolepis indica (L.) Lindl.                        | Methanol | 102.35 ± 3.29                   |
| 9       | FBM-098-012    | Lithocarpus bentramensis (A.Camus) A.Camus             | Methanol | 94.46 ± 7.66                    |
| 10      | FBM-098-015    | Homalium dasyanthum (Turcz.) W. Theob.                 | Methanol | 82.46 ± 1.32                    |
| 11      | FBM-098-016    | Hiptage stellulifera Arenes                            | Methanol | 96.81 ± 4.87                    |
| 12      | FBM-098-017    | Euodia pasteuriana A.Chev. ex Guillaumin               | Methanol | 85.59 ± 3.33                    |
| 13      | FBM-098-021    | Gardenia annamensis Pit.                               | Methanol | 84.29 ± 9.28                    |
| 14      | FBM-098-023    | Pterocaulon redolens (Willd.) Fern.-Vill               | Methanol | 70.08 ± 6.50                    |
| 15      | FBM-098-024    | Lithocarpus pseudosundaicus (Hickel & A.Camus) A.Camus | Methanol | 110.28 ± 1.09                   |
| 16      | FBM-098-025    | Ehretia laevis Roxb.                                   | Methanol | 97.24 ± 2.54                    |
| 17      | FBM-098-026    | Wrightia rubriflora Pit.                               | Methanol | 84.83 ± 11.21                   |
| 18      | FBM-098-028    | Alstonia angustifolia Wall.                            | Methanol | 90.82 ± 7.52                    |
| 19      | FBM-098-031    | Jasminum subtriplinerve Blume                          | Methanol | 82.41 ± 0.44                    |
| 20      | FBM-098-032    | Archidendron lucidum (Benth.) I.C.Nielsen              | Methanol | 127.22 ± 9.22                   |
| 21      | FBM-098-033    | Memecylon langbianense Guillaumin                      | Methanol | 78.32 ± 11.21                   |
| 22      | FBM-098-034    | Antinidia latifolia (Gardner & Champ.) Merr.           | Methanol | 82.30 ± 1.95                    |
| 23      | FBM-098-035    | Castanopsis longipetiolata Hickel & A. Camus           | Methanol | 87.94 ± 2.20                    |
| 24      | FBM-098-036    | Strptocaulon kleinii Wight & Arn.                      | Methanol | 67.21 ± 0.60                    |
| 25      | FBM-098-038    | Salacia rostrata Pierre                                | Methanol | 99.04 ± 6.66                    |
| 26      | FBM-098-040    | Tsoongiodendron odorum Chun                            | Methanol | 92.20 ± 2.34                    |
| 27      | FBM-098-041    | Catunaregam spinosa (Thunb.) Tirveng.                  | Methanol | 108.94 ± 2.45                   |
| 28      | FBM-098-042    | Uvaria cardata (Dunal) Alston                          | Methanol | 112.70 ± 2.84                   |
| 29      | FBM-098-045    | Aporosa Wallichii Hook. F.                             | Methanol | 84.05 ± 0.94                    |

|    |             |                                                |          |                |
|----|-------------|------------------------------------------------|----------|----------------|
| 30 | FBM-098-046 | Hibiscus gagnepaini van borss. Waalk.          | Methanol | 94.55 ± 1.22   |
| 31 | FBM-098-047 | Toxocarpus wightianus Hook & Arn.              | Methanol | 95.40 ± 3.51   |
| 32 | FBM-098-048 | Elaeocarpus tectorius Poir.                    | Methanol | 92.44 ± 6.57   |
| 33 | FBM-098-049 | Alchornea annamica Gagnep.                     | Methanol | -              |
| 34 | FBM-098-050 | Capparis annamensis (Baker f.) M. Jacobs       | Methanol | 78.80 ± 0.22   |
| 35 | FBM-098-052 | Lodes balansae Gagnep.                         | Methanol | 85.55 ± 3.81   |
| 36 | FBM-098-053 | Dillenia alata A. DC.                          | Methanol | 90.27 ± 1.41   |
| 37 | FBM-098-054 | Helixanthera parasitica Lour.                  | Methanol | 97.79 ± 2.45   |
| 38 | FBM-098-055 | Calophyllum dryobalanoides Pierre              | Methanol | 110.70 ± 3.08  |
| 39 | FBM-098-056 | Styrax benzoin Draynd.                         | Methanol | 82.11 ± 8.64   |
| 40 | FBM-098-057 | Kmeria duperreana (Pierre) Dandy               | Methanol | 71.90 ± 1.53   |
| 41 | FBM-098-058 | Polikilospermum annamense (Gagnep.) Merr.      | Methanol | 67.44 ± 3.23   |
| 42 | FBM-098-060 | Grewia tomentosa Juss.                         | Methanol | 75.20 ± 1.25   |
| 43 | FBM-098-061 | Enkianthus quinqueflorus Lour.                 | Methanol | 97.22 ± 5.20   |
| 44 | FBM-098-062 | Symplocos viridissima Brand                    | Methanol | 107.89 ± 3.87  |
| 45 | FBM-098-064 | Sageraea elliptica (A. DC.) Hook. F. & Thomson | Methanol | 94.40 ± 0.52   |
| 46 | FBM-098-065 | Spirolobium cambodianum Baill.                 | Methanol | 70.32 ± 3.94   |
| 47 | FBM-098-066 | Tylophora indica (Burm. F.) Merr.              | Methanol | 65.54 ± 2.77   |
| 48 | FBM-098-067 | Castanopsis annamensis Hickel & A. Camus       | Methanol | 98.24 ± 4.80   |
| 49 | FBM-098-068 | Pericampylus glaucus (Lam.) Merr.              | Methanol | 87.80 ± 1.50   |
| 50 | FBM-098-069 | Semecarpus annamensis Tardieu                  | Methanol | 80.09 ± 0.75   |
| 51 | FBM-098-070 | Jasminum annamense Wernham                     | Methanol | 84.07 ± 1.99   |
| 52 | FBM-098-071 | Sterculia hyposia Miq.                         | Methanol | 78.43 ± 1.54   |
| 53 | FBM-098-072 | Merremia vitifolia (Burm. F.) Hallier f.       | Methanol | 84.57 ± 0.95   |
| 54 | FBM-098-074 | Lasianthus tamirensis Pierre ex Pit.           | Methanol | 89.21 ± 2.54   |
| 55 | FBM-098-75  | Gamphocarpus fruticosus (L.) W.T. Aiton        | Methanol | 74.53 ± 6.21   |
| 56 | FBM-098-076 | Buchanania arborescens (Blume) Blume           | Methanol | 98.22 ± 0.94   |
| 57 | FBM-098-77  | Rothmannia eucodon (K. Schum.) Bremek.         | Methanol | 94.25 ± 2.11   |
| 58 | FBM-098-078 | Jasminum annamense Wernham                     | Methanol | --             |
| 59 | FBM-098-079 | Syzygium malaccense (L.) Merr. & L.M.Perry     | Methanol | 88.41 ± 4.39   |
| 60 | FBM-098-081 | Guettarda speciosa L.                          | Methanol | 134.84 ± 10.90 |
| 61 | FBM-098-083 | Argyreia capitata (Vahl) Choisy                | Methanol | 96.10 ± 5.41   |
| 62 | FBM-098-084 | Trichosanthes tricuspidate Lour.               | Methanol | 87.64 ± 0.47   |
| 63 | FBM-098-086 | Ficus sundaica Blume                           | Methanol | 74.43 ± 3.29   |

|    |             |                                                                                             |                |                |
|----|-------------|---------------------------------------------------------------------------------------------|----------------|----------------|
| 64 | FBM-098-089 | <i>Pterospermum grandiflorum</i> Craib                                                      | Methanol       | 70.54 ± 0.74   |
| 65 | FBM-098-090 | <i>Barringtonia angusta</i> Kurz                                                            | Methanol       | 72.43 ± 0.50   |
| 66 | FBM-098-091 | <i>Canarium subulatum</i> Guill.                                                            | Methanol       | 67.40 ± 2.21   |
| 67 | FBM-098-092 | <i>Diospyros ferea</i> (Willd.) Bakh.                                                       | Methanol       | 78.70 ± 4.01   |
| 68 | FBM-098-093 | <i>Croton krabas</i> Gagnep.                                                                | Methanol       | 77.90 ± 1.04   |
| 69 | FBM-098-095 | <i>Colona evecta</i> Burret                                                                 | Methanol       | 71.90 ± 2.47   |
| 70 | FBM-098-096 | <i>Allophylus cobbe</i> (L) Raeusch.                                                        | Methanol       | 98.21 ± 1.07   |
| 71 | FBM-098-099 | <i>Breynia angustifolia</i> Hook. F.                                                        | Methanol       | 102.44 ± 0.64  |
| 72 | FBM-098-100 | <i>Bauhinia bracteata</i> Baker                                                             | Methanol       | 69.42 ± 1.70   |
| 73 | FBM-108-001 | <i>Vitex negundo</i> for. <i>Loxipaniculata</i> C. P'ei                                     | Ethanol<br>95% | 84.54 ± 0.32   |
| 74 | FBM-108-002 | <i>Routea minor</i> subsp. <i>Monadelpha</i>                                                | Ethanol<br>95% | 86.01 ± 4.22   |
| 75 | FBM-108-003 | <i>Acacia mangium</i> Willd.                                                                | Ethanol<br>95% | 74.22 ± 0.80   |
| 76 | FBM-108-004 | <i>Areca triandra</i> Roxb. Ex Buch.-Ham.                                                   | Ethanol<br>95% | 94.51 ± 4.76   |
| 77 | FBM-108-005 | <i>Oenanthe gavanica</i> (Blume) DC.                                                        | Ethanol<br>95% | -              |
| 78 | FBM-108-006 | <i>Bauhinia brachycarpa</i> var. <i>microphylla</i> (Oliv. Ex Craib) K. Larsen & S.S.Larsen | Ethanol<br>95% | -              |
| 79 | FBM-108-007 | <i>Vigna umbellate</i> (Thunb.) Ohwi & H. Ohashi                                            | Ethanol<br>95% | 94.58 ± 3.74   |
| 80 | FBM-108-008 | <i>Artemisia argyi</i> H. Lev. & Vaniot                                                     | Ethanol<br>95% | 70.44 ± 0.94   |
| 81 | FBM-108-009 | <i>Soroseris hirsuta</i> (J. Anthony) C. Shih                                               | Ethanol<br>95% | 61.07 ± 0.85   |
| 82 | FBM-108-010 | <i>Calamintha debilis</i> (Bunge) Benth.                                                    | Ethanol<br>95% | 87.60 ± 1.42   |
| 83 | FBM-108-011 | <i>Sterculia vilosa</i> Roxb.                                                               | Ethanol<br>95% | 88.97 ± 4.54   |
| 84 | FBM-108-012 | <i>Cerasus conadenia</i> (Koehne) T.T.Yu & C.L.Li.                                          | Ethanol<br>95% | 105.54 ± 21.42 |

|     |             |                                                         |                |               |
|-----|-------------|---------------------------------------------------------|----------------|---------------|
| 85  | FBM-108-013 | Rhododendron rupicola W.W. Sm.                          | Ethanol<br>95% | 94.61 ± 0.44  |
| 86  | FBM-108-014 | Sorbaria kirilowii (Regel) Maxim.                       | Ethanol<br>95% | 74.22 ± 0.24  |
| 87  | FBM-108-015 | Sorbaria arborea C.K. Schneid.                          | Ethanol<br>95% | 80.46 ± 1.02  |
| 88  | FBM-108-016 | Potentilla glabra var. mandshurica (Maxim.) Hand.-Mazz. | Ethanol<br>95% | 80.96 ± 1.23  |
| 89  | FBM-108-017 | Primula sonchifolia Franch.                             | Ethanol<br>95% | 79.04 ± 2.10  |
| 90  | FBM-108-018 | Crotalaria chinensis L.                                 | Ethanol<br>95% | 69.45 ± 4.40  |
| 91  | FBM-108-019 | Callistemon rigidus R. Br.                              | Ethanol<br>95% | 94.54 ± 0.67  |
| 92  | FBM-108-020 | Aganosma schlechteriana H. Lev.                         | Ethanol<br>95% | 66.94 ± 0.94  |
| 93  | FBM-108-021 | Cassytha filiformis L.                                  | Ethanol<br>95% | 77.80 ± 0.97  |
| 94  | FBM-108-022 | Marsdenia oreophila W.W. Sm.                            | Ethanol<br>95% | 70.89 ± 2.02  |
| 95  | FBM-108-023 | Cotoneaster divaricatus Rehder & E.H.Wilsom             | Ethanol<br>95% | 92.26 ± 2.54  |
| 96  | FBM-108-024 | Rhododendron cephalanthum Franch.                       | Ethanol<br>95% | 94.60 ± 0.22  |
| 97  | FBM-108-025 | Ligularia ductiformis (C.G.A. Winkl.)                   | Ethanol<br>95% | 100.43 ± 1.49 |
| 98  | FBM-108-026 | Thalictrum finetii B. Boivin                            | Ethanol<br>95% | 94.18 ± 3.20  |
| 99  | FBM-108-027 | Abelia dielsii (Graebn.) Rehder                         | Ethanol<br>95% | 74.98 ± 3.90  |
| 100 | FBM-108-028 | Rheum delavayi Franch.                                  | Ethanol<br>95% | 74.50 ± 0.20  |
